# Supplementary material
Source: publisher site journal article supplement (https://www.dovepress.com/article/297263)
Supplement: Supplementary file 1 [file get_supplementary_file.php]

**Supplementary material**


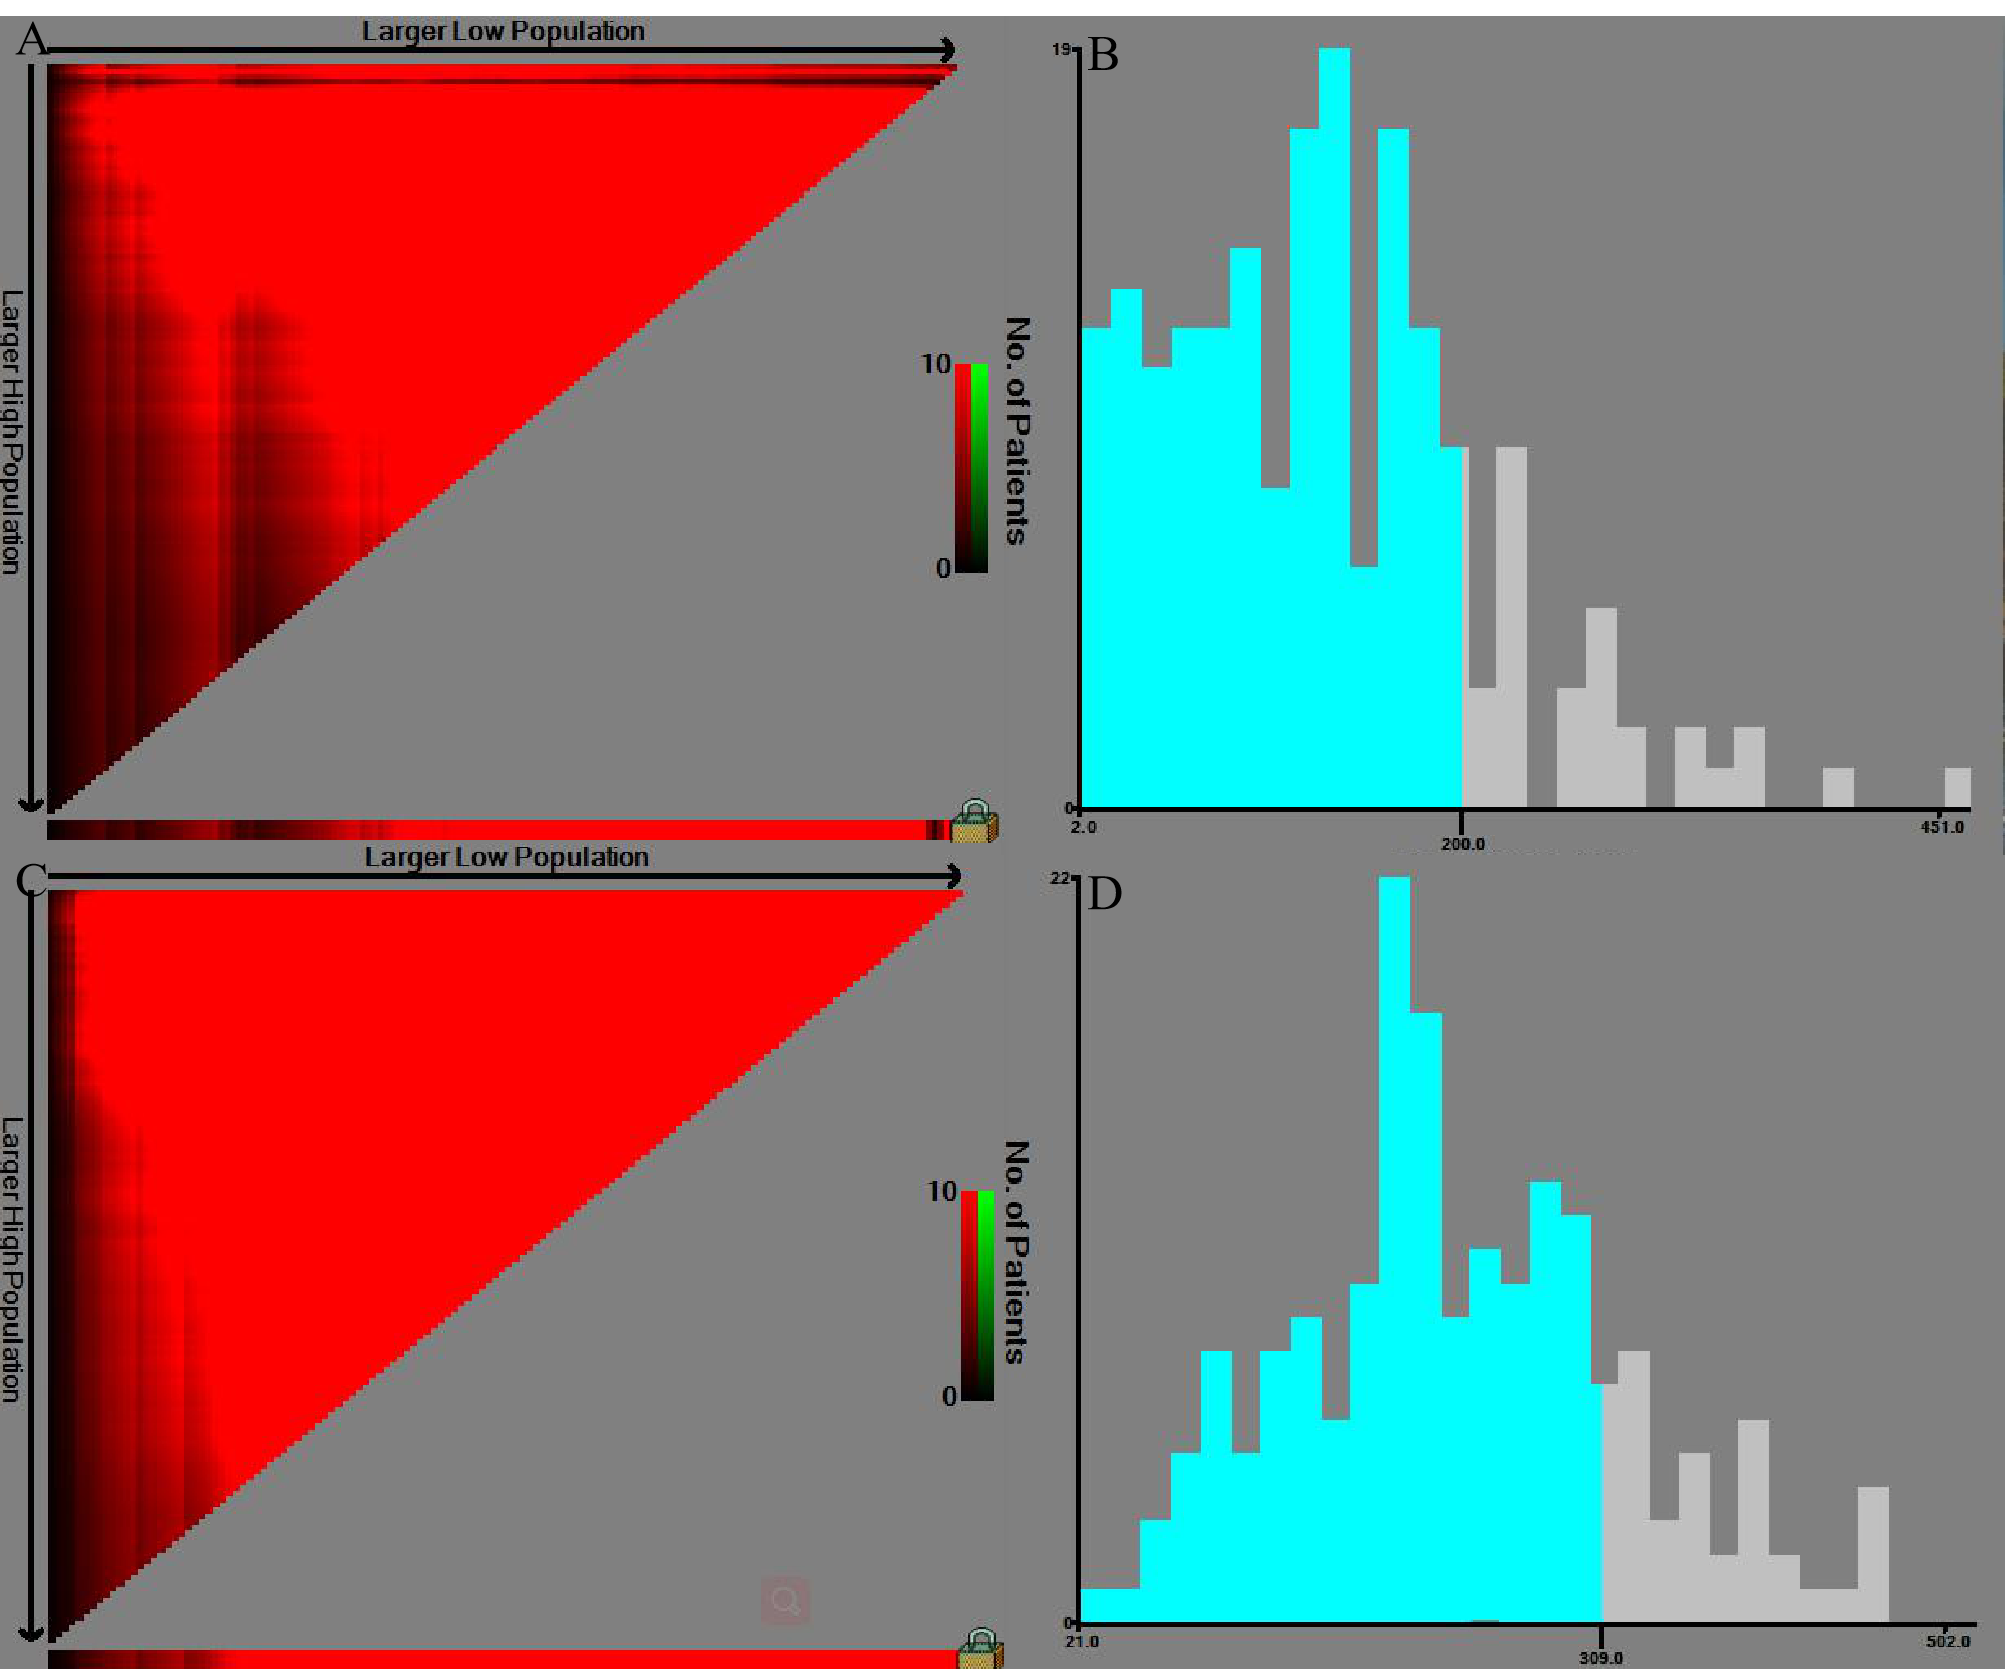


Supplementary Figure S1

Cutoff points for CD68 and CD163 counts determined by the X-tile program. X-tile analysis selected the optimal cutoff values for the CD163 (A) and CD68 (C) counts based on patient survival data. (B) and (D) The entire cohort was divided into low (blue) and high (gray) for CD68 and CD163 count groups based on the optimal cutoff point (200 for CD163, and 309 for CD68).
